# Supplementary material for: Polymorphism and polymorph-dependent luminescence properties of the first lithium oxonitridolithosilicate Li3SiNO2:Eu2+
Source: Royal Society of Chemistry journal article supplement (doi:10.1039/d2dt03921d), 2023-01-01
Supplement: d2dt03921d1.pdf [file d2dt03921d1.pdf]

## Supplementary Information

### Polymorphism and polymorph-dependent luminescence properties of the first lithium oxonitridolithosilicate $\text{Li}_3\text{SiNO}_2:\text{Eu}^{2+}$

Kilian M. Rießbeck<sup>[a]</sup>, Daniel S. Wimmer<sup>[a]</sup>, Markus Seibald<sup>[b]</sup>, Dominik Baumann<sup>[b]</sup>, Klaus Wurst<sup>[a]</sup>, Gunter Heymann<sup>[a]</sup>, and Hubert Huppertz<sup>\*[a]</sup>

[a] K. M. Rießbeck, D. S. Wimmer, Dr. K. Wurst, Assoc. Univ.-Prof. Dr. G. Heymann, Univ.-Prof. Dr. H. Huppertz: Department of General, Inorganic and Theoretical Chemistry, Universität Innsbruck, Innrain 80-82, A-6020 Innsbruck, Austria  
E-Mail: [Hubert.Huppertz@uibk.ac.at](mailto:Hubert.Huppertz@uibk.ac.at)  
<https://www.uibk.ac.at/en/aatc/ag-huppertz>

[b] Dr. M. Seibald, Dr. D. Baumann: ams-OSRAM International GmbH, Mittelstetter Weg 2, D-86830 Schwabmünchen, Germany

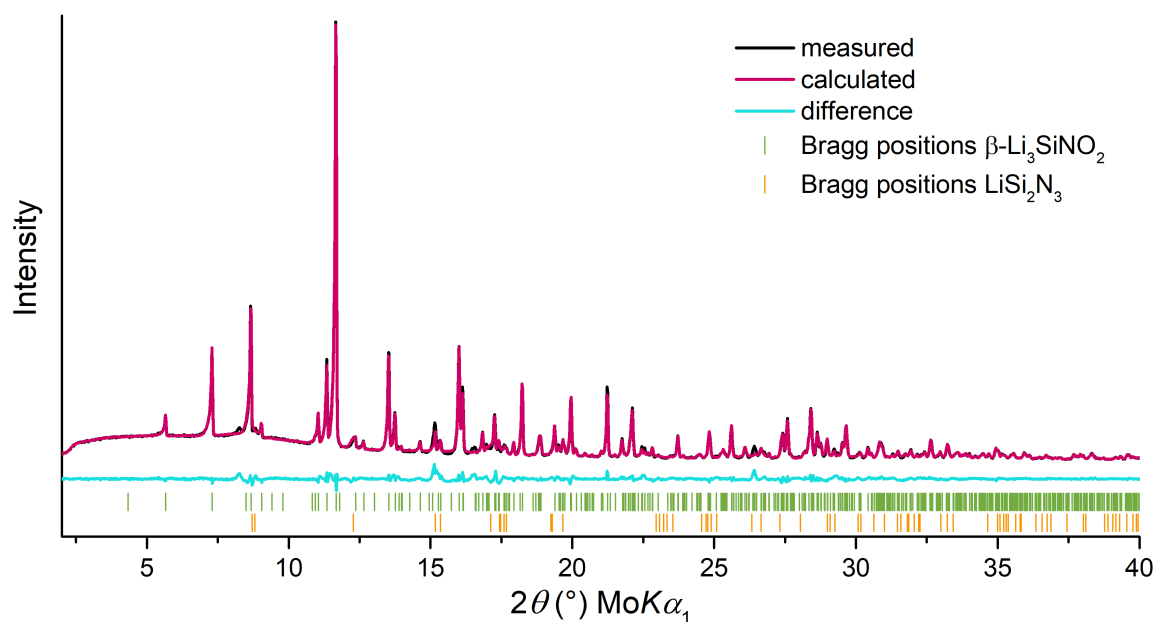

**Figure S1:** Rietveld refinement of the X-ray diffraction data from a powder sample of  $\beta\text{-Li}_3\text{SiNO}_2$ . The measured pattern is shown in black, the calculated pattern in red, the difference curve in turquoise and the tick marks of the

theoretical positions for the reflections are shown in green for  $\beta$ - $\text{Li}_3\text{SiNO}_2$  and in orange for the side phase  $\text{LiSi}_2\text{N}_3$ .

**Table S1:** Report of the Rietveld refinements of the powder X-ray diffraction data from undoped and doped  $\beta$ - $\text{Li}_3\text{SiNO}_2$  samples.

| <b>Parameter</b>                                                                           | <b>Value (undoped sample)</b> | <b>Value (doped sample)</b> |
|--------------------------------------------------------------------------------------------|-------------------------------|-----------------------------|
| <b>Phase composition</b>                                                                   |                               |                             |
| $\beta$ - $\text{Li}_3\text{SiNO}_2$ /wt%                                                  | 95.1(2)                       | 93.7(6)                     |
| $\text{LiSi}_2\text{N}_3$ /wt%                                                             | 4.9(2)                        | 6.3(6)                      |
| <b>Powder diffraction data of <math>\beta</math>-<math>\text{Li}_3\text{SiNO}_2</math></b> |                               |                             |
| Diffractometer                                                                             |                               | STOE STADI P                |
| Radiation; wavelength / $\text{\AA}$                                                       |                               | Mo- $K\alpha_1$ ; 0.7093    |
| $a$ / $\text{\AA}$                                                                         | 18.7462(5)                    | 18.7451(7)                  |
| $b$ / $\text{\AA}$                                                                         | 11.1270(4)                    | 11.1254(5)                  |
| $c$ / $\text{\AA}$                                                                         | 5.0897(2)                     | 5.0916(2)                   |
| Cell volume / $\text{\AA}^3$                                                               | 1061.66(5)                    | 1061.83(7)                  |
| $2\theta$ range / $^\circ$                                                                 | 2 – 40                        | 2 – 42                      |
| $2\theta$ step width / $^\circ$                                                            | 0.015                         | 0.015                       |
| $R_{\text{exp}}$ /%                                                                        | 1.78                          | 5.31                        |
| $R_{\text{wp}}$ /%                                                                         | 6.14                          | 8.40                        |
| $R_{\text{p}}$ /%                                                                          | 3.91                          | 6.25                        |
| $R_{\text{Bragg}}$ /%                                                                      | 2.10                          | 2.733                       |

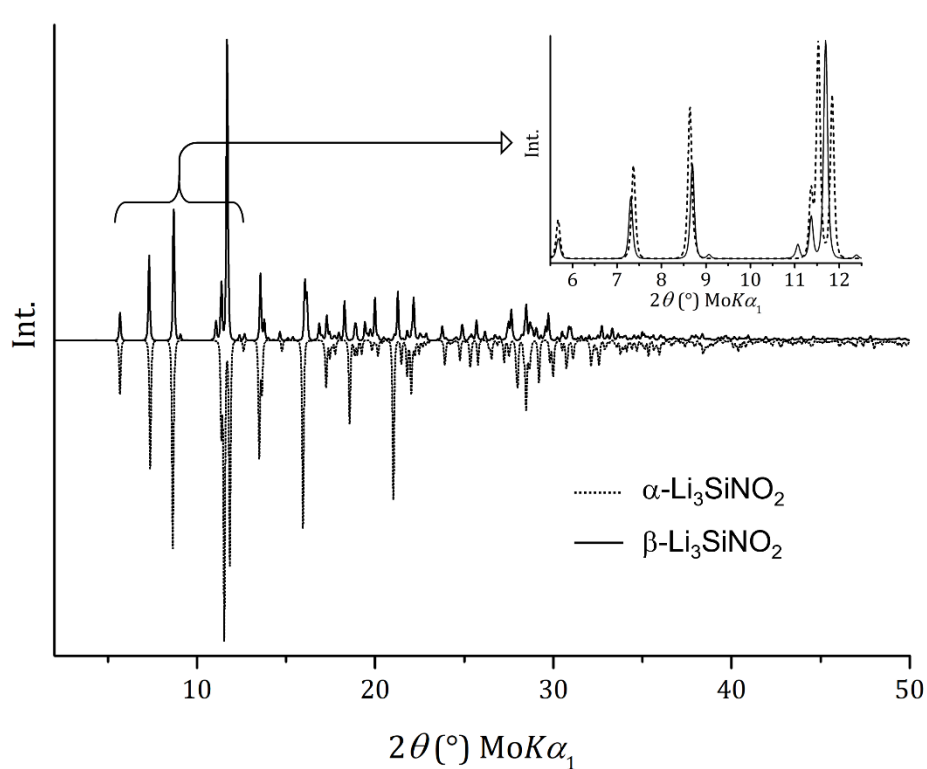

**Figure S2:** Comparison of the powder X-ray diffraction patterns for  $\alpha$ - (negative values/ dotted line) and  $\beta$ -Li<sub>3</sub>SiNO<sub>2</sub> (positive values/ solid line). The inset shows similarities and significant differences between the polymorphs in the lower diffraction angles.

**Table S2:** Wyckoff positions, atomic coordinates, and equivalent isotropic displacement parameters  $U_{eq}$  ( $\text{\AA}^2$ ) of orthorhombic  $\beta$ -Li<sub>3</sub>SiNO<sub>2</sub> (standard deviations in parentheses).

| Atom | Wyckoff-Position | x          | y          | z          | $U_{eq}$    | occ.      |
|------|------------------|------------|------------|------------|-------------|-----------|
| Si1  | 8c               | 0.98497(2) | 0.67981(5) | 0.77906(9) | 0.0141(2)   | 1         |
| Si2  | 8c               | 0.76186(2) | 0.67932(4) | 0.17254(9) | 0.0143(2)   | 1         |
| O1   | 8c               | 0.93834(6) | 0.5624(2)  | 0.6621(2)  | 0.0162(3)   | 1         |
| O2   | 8c               | 0.80929(6) | 0.5616(2)  | 0.2823(2)  | 0.0174(4)   | 1         |
| O3   | 8c               | 0.92995(6) | 0.3576(2)  | 0.2544(3)  | 0.0273(5)   | 1         |
| O4   | 8c               | 0.67788(7) | 0.6406(2)  | 0.2236(3)  | 0.0295(5)   | 1         |
| N1   | 8c               | 0.96028(8) | 0.6952(2)  | 0.1019(3)  | 0.0186(4)   | 1         |
| N2   | 8c               | 0.78621(8) | 0.6951(2)  | 0.8473(3)  | 0.0183(4)   | 1         |
| Li1  | 8c               | 0.8728(2)  | 0.4583(2)  | 0.4744(4)  | 0.034(2)    | 0.9854(7) |
| Eu1  | 8c               | 0.8728(2)  | 0.4583(2)  | 0.4744(4)  | 0.000026(2) | 0.0146(7) |
| Li2  | 8c               | 0.8783(2)  | 0.2303(3)  | 0.4774(5)  | 0.052(3)    | 0.9888(8) |
| Eu2  | 8c               | 0.8783(2)  | 0.2303(3)  | 0.4774(5)  | 0.000031(3) | 0.0112(8) |
| Li3  | 8c               | 0.8737(2)  | 0.6836(3)  | 0.4728(7)  | 0.029(2)    | 1         |
| Li4  | 8c               | 0.8716(2)  | 0.5747(5)  | 0.9658(9)  | 0.0279(9)   | 0.78      |
| Li4a | 8c               | 0.8733(8)  | 0.518(2)   | 0.964(3)   | 0.028(3)    | 0.22      |
| Li5  | 8c               | 0.0144(2)  | 0.4493(3)  | 0.6988(7)  | 0.035(2)    | 1         |
| Li6  | 8c               | 0.7488(2)  | 0.4395(3)  | 0.1271(7)  | 0.032(2)    | 1         |

**Table S3:** Anisotropic displacement parameters  $U_{ij}$  ( $\text{\AA}^2$ ) of orthorhombic  $\beta$ -Li<sub>3</sub>SiNO<sub>2</sub> (standard deviations in parentheses).

| Atom | $U_{11}$  | $U_{22}$  | $U_{33}$  | $U_{12}$   | $U_{13}$   | $U_{23}$   |
|------|-----------|-----------|-----------|------------|------------|------------|
| Si1  | 0.0158(2) | 0.0133(2) | 0.0132(2) | -0.0002(2) | -0.0007(2) | -0.0008(2) |
| Si2  | 0.0164(2) | 0.0129(2) | 0.0135(2) | -0.0006(2) | 0.0003(2)  | -0.0001(2) |
| O1   | 0.0175(6) | 0.0137(6) | 0.0173(6) | 0.0002(4)  | 0.0002(5)  | -0.0017(4) |
| O2   | 0.0208(6) | 0.0140(6) | 0.0173(6) | -0.0017(5) | -0.0035(5) | 0.0006(4)  |
| O3   | 0.0181(7) | 0.0300(9) | 0.0337(8) | -0.0006(5) | 0.0000(6)  | -0.0100(6) |
| O4   | 0.0228(7) | 0.0336(9) | 0.0322(8) | -0.0046(6) | 0.0044(6)  | -0.0073(6) |
| N1   | 0.0280(7) | 0.0138(7) | 0.0139(7) | 0.0001(6)  | 0.0006(6)  | 0.0011(5)  |
| N2   | 0.0281(7) | 0.0142(7) | 0.0126(7) | 0.0005(6)  | -0.0020(6) | 0.0001(5)  |
| Li1  | 0.036(3)  | 0.038(3)  | 0.028(3)  | 0.003(2)   | 0.001(2)   | 0.003(2)   |

|     |          |          |          |           |           |           |
|-----|----------|----------|----------|-----------|-----------|-----------|
| Li2 | 0.044(4) | 0.062(6) | 0.050(5) | -0.020(2) | -0.018(2) | 0.018(2)  |
| Li3 | 0.027(2) | 0.016(2) | 0.043(2) | 0.000(2)  | -0.018(2) | -0.001(2) |
| Li5 | 0.058(2) | 0.029(2) | 0.016(2) | 0.027(2)  | -0.001(2) | 0.005(2)  |
| Li6 | 0.048(2) | 0.018(2) | 0.026(2) | -0.014(2) | -0.014(2) | 0.005(2)  |

**Table S4:** Interatomic distances of orthorhombic  $\beta$ -Li<sub>3</sub>SiNO<sub>2</sub> (standard deviations in parentheses).

|      |      |          |          |       |
|------|------|----------|----------|-------|
| Si1  | - N1 | 1.716(2) |          |       |
|      | - N1 | 1.720(2) | ∅ Si1-N  | 1.718 |
|      | - O1 | 1.680(2) |          |       |
|      | - O3 | 1.656(2) | ∅ Si1-O  | 1.668 |
| Si2  | - N2 | 1.726(2) |          |       |
|      | - N2 | 1.718(2) | ∅ Si2-N  | 1.722 |
|      | - O2 | 1.678(2) |          |       |
|      | - O4 | 1.652(2) | ∅ Si2-O  | 1.665 |
| Li1  | - O1 | 1.941(3) |          |       |
|      | - O2 | 1.922(3) |          |       |
|      | - O3 | 1.912(3) |          |       |
|      | - O4 | 1.929(3) | ∅ Li1-O  | 1.926 |
| Li2  | - O3 | 1.970(4) |          |       |
|      | - O3 | 2.056(4) |          |       |
|      | - O4 | 1.943(4) |          |       |
|      | - O4 | 2.178(4) | ∅ Li2-O  | 2.037 |
| Li3  | - N1 | 2.210(4) |          |       |
|      | - N1 | 2.493(4) |          |       |
|      | - N2 | 2.216(4) |          |       |
|      | - N2 | 2.517(4) | ∅ Li3-N  | 2.359 |
|      | - O1 | 2.053(4) |          |       |
|      | - O2 | 2.058(4) | ∅ Li3-O  | 2.056 |
| Li4  | - N1 | 2.245(5) |          |       |
|      | - N2 | 2.172(5) | ∅ Li4-N  | 2.209 |
|      | - O1 | 1.993(5) |          |       |
|      | - O2 | 1.995(5) |          |       |
|      | - O3 | 3.03(6)  |          |       |
|      | - O4 | 2.85(6)  | ∅ Li4-O  | 2.47  |
| Li4a | - N1 | 2.65(2)  |          |       |
|      | - N2 | 2.63(2)  | ∅ Li4a-N | 2.64  |
|      | - O1 | 2.02(2)  |          |       |
|      | - O2 | 2.07(2)  |          |       |
|      | - O3 | 2.55(2)  |          |       |
|      | - O4 | 2.35(2)  | ∅ Li4a-O | 2.25  |
| Li5  | - N1 | 1.960(4) |          |       |
|      | - O1 | 1.910(4) |          |       |

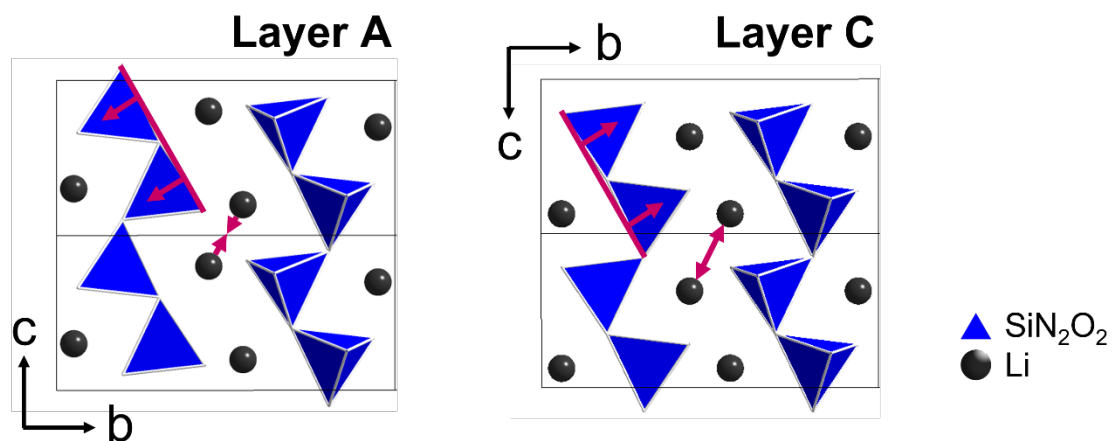

|     |      |          |         |       |
|-----|------|----------|---------|-------|
|     | - O1 | 2.043(4) |         |       |
|     | - O3 | 2.400(4) | ∅ Li5-O | 2.118 |
| Li6 | - N2 | 1.983(4) |         |       |
|     | - O2 | 1.938(4) |         |       |
|     | - O2 | 2.065(4) |         |       |
|     | - O4 | 2.627(4) |         |       |
|     | - O4 | 2.649(4) | ∅ Li6-O | 2.320 |

**Figure S3:** Comparison of excerpts of layer A (left) and C (right) of  $\beta$ - $\text{Li}_3\text{SiNO}_2$  with the differences relevant to the changed connection scheme marked in red. For clarity, the anions are not shown here.

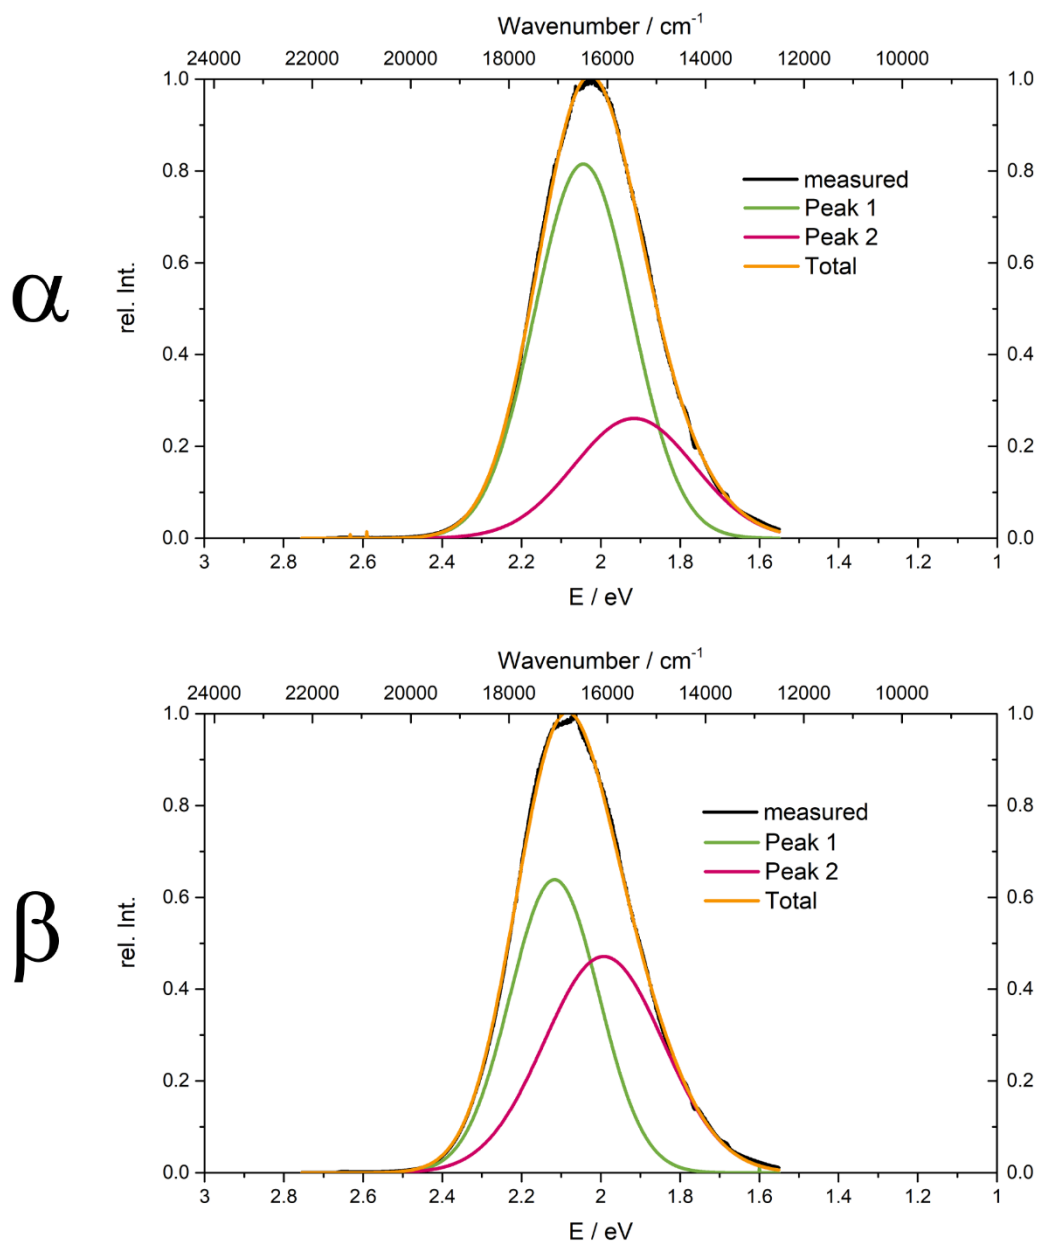

**Figure S4:** Bimodal Gauß-fits of the emission spectra obtained from powder samples of  $\alpha$ - and  $\beta$ - $\text{Li}_3\text{SiNO}_2\text{:Eu}^{2+}$ .

**Table S5:** Parameters of the two Gauß-curves of the decomposition of the emission spectra from powder samples of  $\alpha$ - and  $\beta$ - $\text{Li}_3\text{SiNO}_2\text{:Eu}^{2+}$ .

|                                              | $\alpha$ - $\text{Li}_3\text{SiNO}_2$ |        | $\beta$ - $\text{Li}_3\text{SiNO}_2$ |        |
|----------------------------------------------|---------------------------------------|--------|--------------------------------------|--------|
|                                              | Peak 1                                | Peak 2 | Peak 1                               | Peak 2 |
| rel. Intensity                               | 0.72                                  | 0.28   | 0.50                                 | 0.50   |
| $E_{\text{peak}} / \text{eV}$                | 2.04                                  | 1.92   | 2.12                                 | 1.99   |
| $\tilde{\nu}_{\text{peak}} / \text{cm}^{-1}$ | 16488                                 | 15456  | 17072                                | 16071  |
| FWHM / eV                                    | 0.29                                  | 0.36   | 0.26                                 | 0.35   |
| FWHM / $\text{cm}^{-1}$                      | 2323                                  | 2886   | 2130                                 | 2850   |

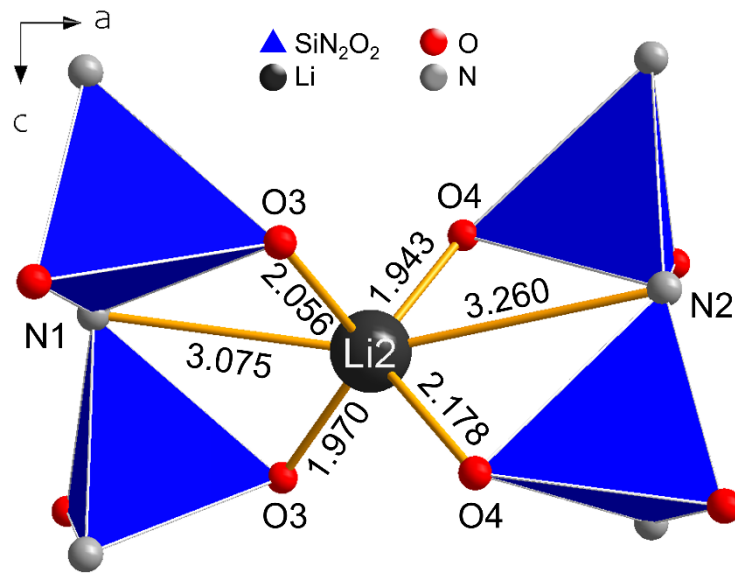

**Figure S5:** The local environment of the Li2-position in  $\beta\text{-Li}_3\text{SiNO}_2\text{:Eu}^{2+}$  is shown with its bond lengths in a 4+2 coordination.
